# Supplementary material
Source: PubMed Central journal article supplement (PMC7476526)
Supplement: bi0c00241_si_001.pdf [file bi0c00241_si_001.pdf]

## SUPPORTING INFORMATION

### **Orotidine 5'-Monophosphate Decarboxylase: The Operation of Active Site Chains Within and Across Protein Subunits.**

Tiago A. S. Brandão<sup>‡</sup> and John P. Richard<sup>†,\*</sup>

<sup>‡</sup> Department of Chemistry, ICEX, Federal University of Minas Gerais, Belo Horizonte, MG, 31270-901, Brazil.

<sup>†</sup> Department of Chemistry, University at Buffalo, SUNY, Buffalo, New York 14260-3000

\* Author to whom correspondence should be addressed: EMAIL: [jrichard@buffalo.edu](mailto:jrichard@buffalo.edu)

---

Figures S1A - S1C show plots of  $v/[E]$  against [OMP] for decarboxylation catalyzed by D37G, D37A and T100'A variants, respectively, of OMPDC at 25 °C, pH 7.1 (30 mM MOPS) and ionic strength of 0.105 (NaCl). The solid lines in Figures S1A - S1C show the non-linear least squares fit of these experimental data to the Michaelis-Menten equation using the values of  $k_{cat}$  and  $K_m$  from Table 1 in the main text. Figures S2A and S2B show plots of  $v/[E]$  against [FOMP] for decarboxylation catalyzed by D37G, D37A variants of OMPDC at 25 °C, pH 7.1 (30 mM MOPS) and ionic strength of 0.105 (NaCl). The solid lines in Figures S2A and S2B show the non-linear least squares fit of these experimental data to the Michaelis-Menten equation using the values of  $k_{cat}$  and  $K_m$  from Table 1 in the main manuscript.

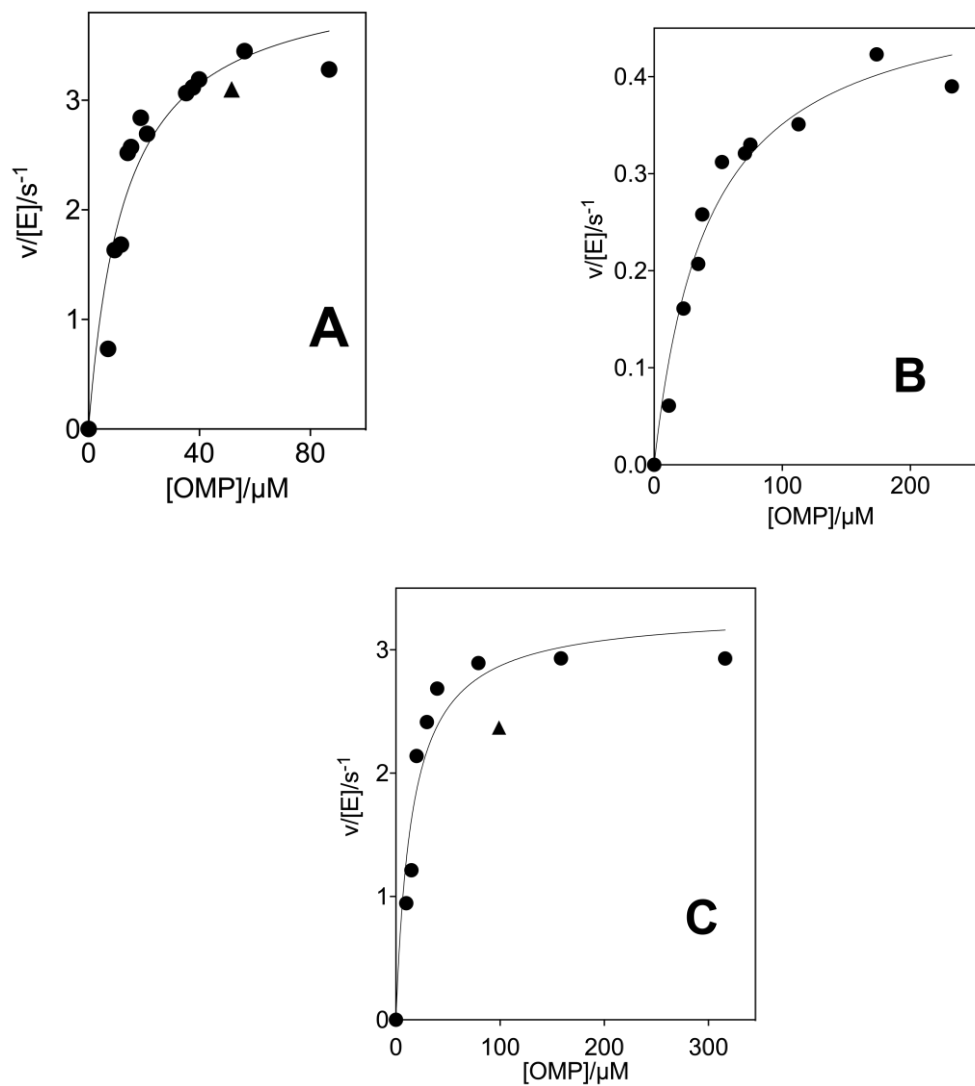

**Figure S1.** Dependence of  $v/[E]$  for decarboxylation of OMP catalyzed by variant forms of OMPDC on the concentration of OMP for reactions at 25 °C, pH 7.1 (30 mM MOPS)  $I = 0.105$  (NaCl). Key: A, D37G variant of [OMPDC] = 110 nM; B, D37A variant at [OMPDC] = 210 nM; C, T100'A variant at [OMPDC] = 270 nM.

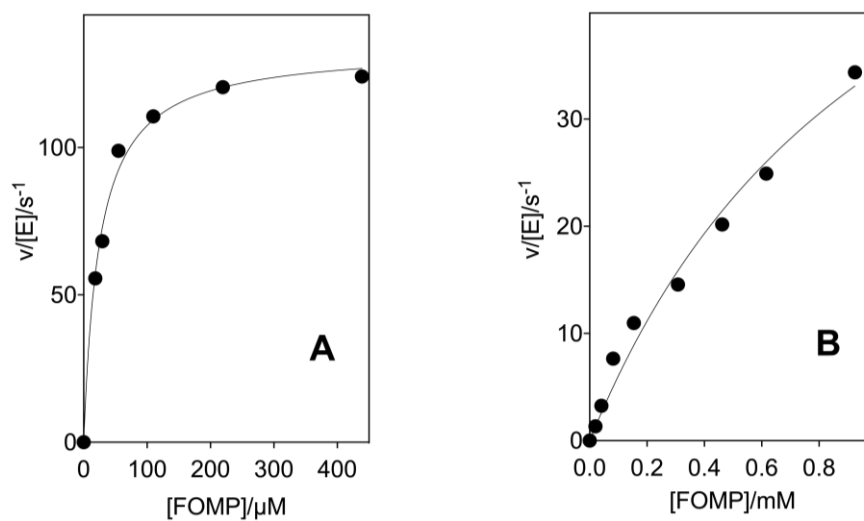

**Figure S2.** Dependence of  $v/[E]$  for decarboxylation of FOMP catalyzed by variant forms of OMPDC on the concentration of OMP for reactions at 25 °C, pH 7.1 (30 mM MOPS)  $I = 0.105$  (NaCl). Key: A, D37G variant at  $[\text{OMPDC}] = 56 \text{ nM}$ ; (B) D37A variant at  $[\text{OMPDC}] = 60 \text{ nM}$ .
